# Supplementary material for: 3D architectured zinc–chromium layered double hydroxide with nickel cobalt sulfide composite for the electrochemical detection of ronidazole
Source: Royal Society of Chemistry journal article supplement (doi:10.1039/d3en00804e), 2024-01-01
Supplement: d3en00804e1.pdf [file d3en00804e1.pdf]

1

Supplementary document

2 **3D Architected Zinc- Chromium Layered Double Hydroxide with Nickel**  
3 **Cobalt Sulfide Composite for the Electrochemical Detection of Ronidazole**

4 **Thangavelu Sakthi Priya <sup>a</sup>, Tse-Wei Chen <sup>b, \*</sup>, Shen-Ming Chen <sup>a, \*</sup>, Thangavelu**  
5 **Kokulnathan <sup>a</sup>, Bih-Show Lou<sup>c,d\*</sup>, Riaz Ullah <sup>e</sup>, Wedad A. Al-onazif<sup>f</sup>, Mohamed S Elshikh <sup>g</sup>.**

6 *<sup>a</sup>Department of Chemical Engineering and Biotechnology, College of Engineering, National*  
7 *Taipei University of Technology, No. 1, Section 3, Chung-Hsiao East Road, Taipei 106, Taiwan,*  
8 *ROC.*

9 *<sup>b</sup>Department of Materials, Imperial College London, London, SW7 2AZ, United Kingdom.*

10 *<sup>c</sup>Chemistry Division, Center for General Education, Chang Gung University, Taoyuan 333,*  
11 *Taiwan.*

12 *<sup>d</sup>Department of Orthopaedic Surgery, New Taipei Municipal TuCheng Hospital, Chang Gung*  
13 *Memorial Hospital, New Taipei City, 236, Taiwan.*

14 *<sup>e</sup>Department of Pharmacognosy, College of Pharmacy, King Saud University, Riyadh, Saudi*  
15 *Arabia.*

16 *<sup>f</sup>Department of Chemistry, College of Science, King Saud University, P.O. Box 22452, Riyadh*  
17 *11495, Saudi Arabia.*

18 *<sup>g</sup>Department of Botany and Microbiology, College of Science, King Saud University, Riyadh*  
19 *11451, Saudi Arabia.*

20

21

22 **\*Corresponding Authors:**

23 [twchenchem@gmail.com](mailto:twchenchem@gmail.com) (T.-W. Chen)

24 [smchen78@ms15.hinet.net](mailto:smchen78@ms15.hinet.net) (S.-M. Chen)

25 [blou@mail.cgu.edu.tw](mailto:blou@mail.cgu.edu.tw) (B.-S. Lou)

26

27

28

29

30

31

32

33

34

35

36

37

38

39

40

41

## 42 *Chemicals and reagents*

43 Zinc nitrate hexahydrate ( $\text{Zn}(\text{NO}_3)_2 \cdot 6\text{H}_2\text{O}$ ; 98.0%), chromium(III) nitrate nonahydrate  
44 ( $\text{Cr}(\text{NO}_3)_3 \cdot 9\text{H}_2\text{O}$ ; 99.0%), ammonium fluoride ( $\text{NH}_4\text{F}$ ;  $\geq 99.99\%$ ), urea ( $\text{CO}(\text{NH}_2)_2$ ;  $\geq 99.5\%$ ),  
45 Nickel (II) nitrate hexahydrate ( $\text{Ni}(\text{NO}_3)_2 \cdot 6\text{H}_2\text{O}$ ,  $\geq 97.0\%$ ), Cobalt (II) nitrate hexahydrate  
46 ( $\text{Ni}(\text{NO}_3)_2 \cdot 6\text{H}_2\text{O}$ ;  $\geq 98.0\%$ ), glycerol ( $\text{C}_3\text{H}_8\text{O}_3$ ;  $\geq 99.0\%$ ), isopropanol ( $\text{C}_3\text{H}_8\text{O}$ ; anhydrous; 99.5%),  
47 thioacetamide ( $\text{C}_2\text{H}_5\text{NS}$ ; 98.0%), Ronidazole ( $\text{C}_6\text{H}_8\text{N}_4\text{O}_4$ ;  $\geq 95.0\%$ ), sodium phosphate dibasic  
48 anhydrous ( $\text{NaH}_2\text{PO}_4$ ,  $\geq 99.0\%$ ), sodium phosphate monobasic dihydrate ( $\text{NaH}_2\text{PO}_4 \cdot 2\text{H}_2\text{O}$ ,  
49  $\leq 100\%$ ) were purchased from Sigma- Aldrich (Taiwan). Sodium hydroxide ( $\text{NaOH}$ ,  $\geq 98\%$ ),  
50 potassium chloride ( $\text{KCl}$ ,  $\leq 100\%$ ) hydrochloric acid ( $\text{HCl}$ ,  $\geq 37\%$ ) were purchased from  
51 Honeywell Fluka (Taiwan). Potassium ferricyanide ( $\text{K}_3\text{Fe}(\text{CN})_6$ ,  $> 98\%$ ) and potassium  
52 ferrocyanide ( $\text{K}_4\text{Fe}(\text{CN})_6 \cdot 3\text{H}_2\text{O}$ ,  $> 99\%$ ) from Duksan (Taiwan). Alumina powder ( $0.05\mu\text{m}$ ) and  
53 ethanol ( $\text{C}_2\text{H}_5\text{OH}$ , 95%) were bought from Struers (Taiwan) and Taiwan Sugar Corporation. De-  
54 ionized water (DI) was used for preparation and washings. All the chemicals were analytical grade  
55 and used without further purification.

## 56 *Instrumentation*

57 X-ray diffraction analysis (XRD) was done with an X-ray diffractometer (PANalytical  
58 B.V.) using the monochromatic  $\text{Cu-K}\alpha$  line with a PIXcel3D detector. Fourier-transform infrared  
59 (FT-IR) spectroscopy was performed using a JASCO FT/IR-6600 spectrophotometer.  
60 Transmission electron microscope (TEM) images were obtained from a JEOL-JEM-2100F  
61 equipped with selected area electron diffraction (SAED), energy-dispersive X-ray (EDX)  
62 spectrometer, and elemental mapping. High-resolution X-ray photoelectron spectroscopy (HR-  
63 XPS) was conducted with Thermo ESCALAB 250. Electrochemical Impedance Spectroscopy  
64 (EIS) was performed with Admiral Instruments Squidstat Plus Potentiostat (1709 CH1).

65 **Electrochemical cell setup**

66 In the three-electrode electrochemical cell setup, a Glassy carbon electrode (GCE),  
67 Ag/AgCl (saturated KCl) electrode, and platinum wire were taken as working, reference, and an  
68 auxiliary electrode. Cyclic voltammetry (CV) and Difference Pulse Voltammetry (DPV)  
69 measurements were carried out with CH Instrument electrochemical workstation CHI 611A and  
70 CHI 900. 0.1 M phosphate buffer (PB) solution was chosen as the working electrolyte in all  
71 experiments.

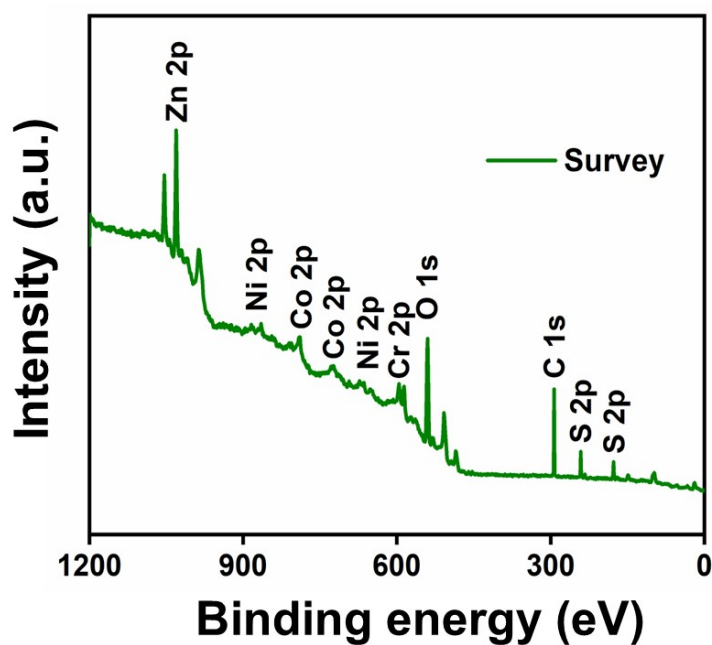

72

73

**Fig. S1** Survey spectrum of ZC/NCS composite.

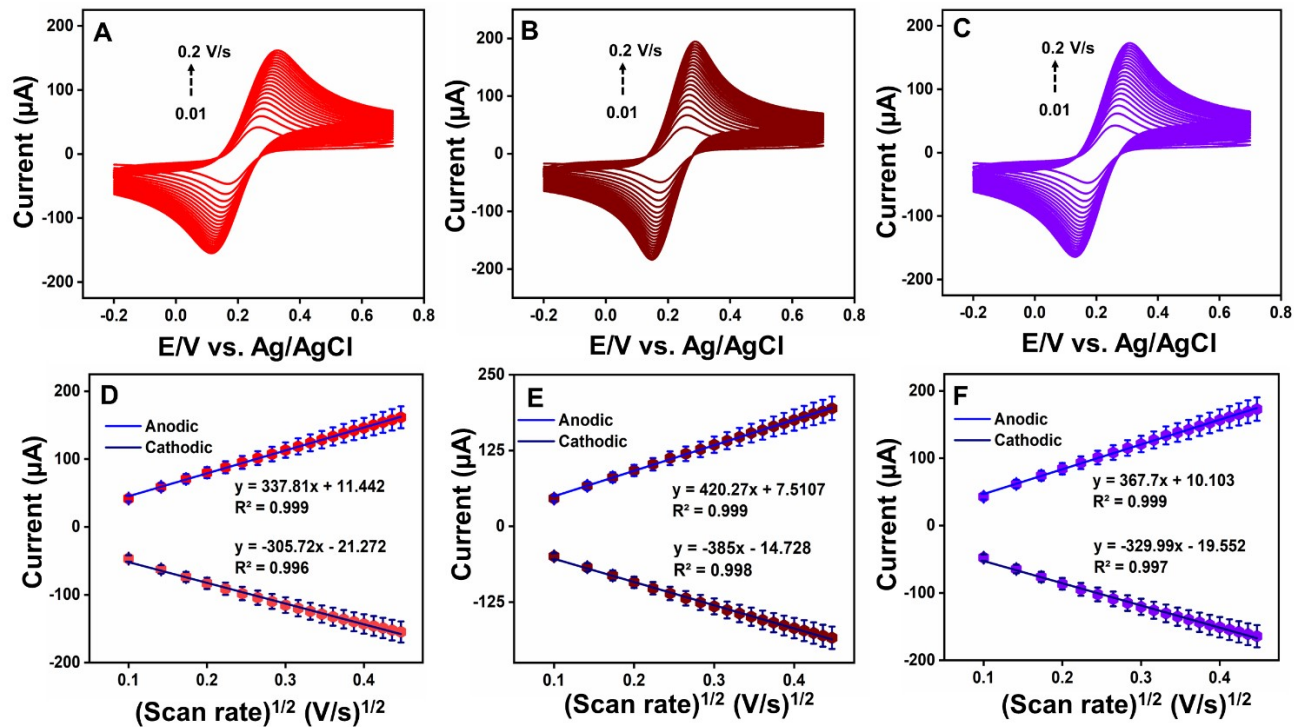

74

75 **Fig. S2** CV curves of (A) bare GCE, (B) ZC/GCE, (C) NCS/GCE at various scan rates and their  
 76 respective linear calibration plots of resultant current (D) bare GCE, (E) ZC/GCE, and (F) NCS  
 77 GCE.

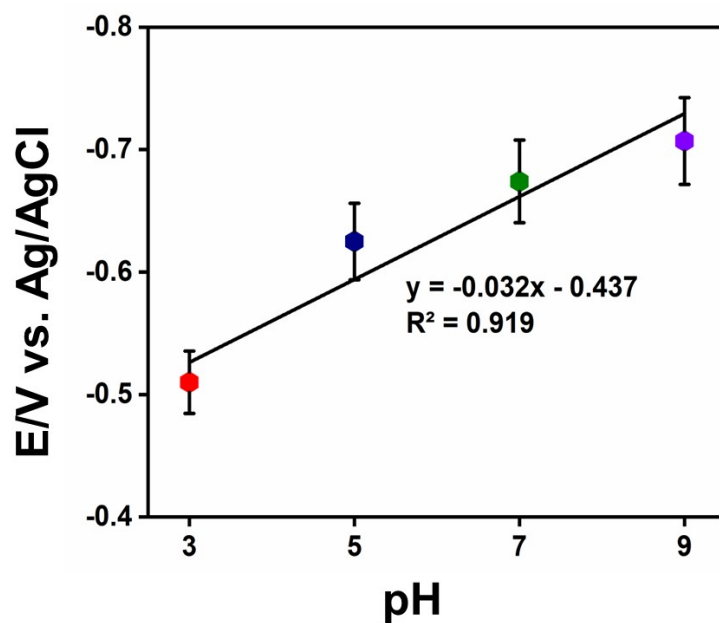

78

Fig. S3 A linear plot between the potential shift Vs. pH.

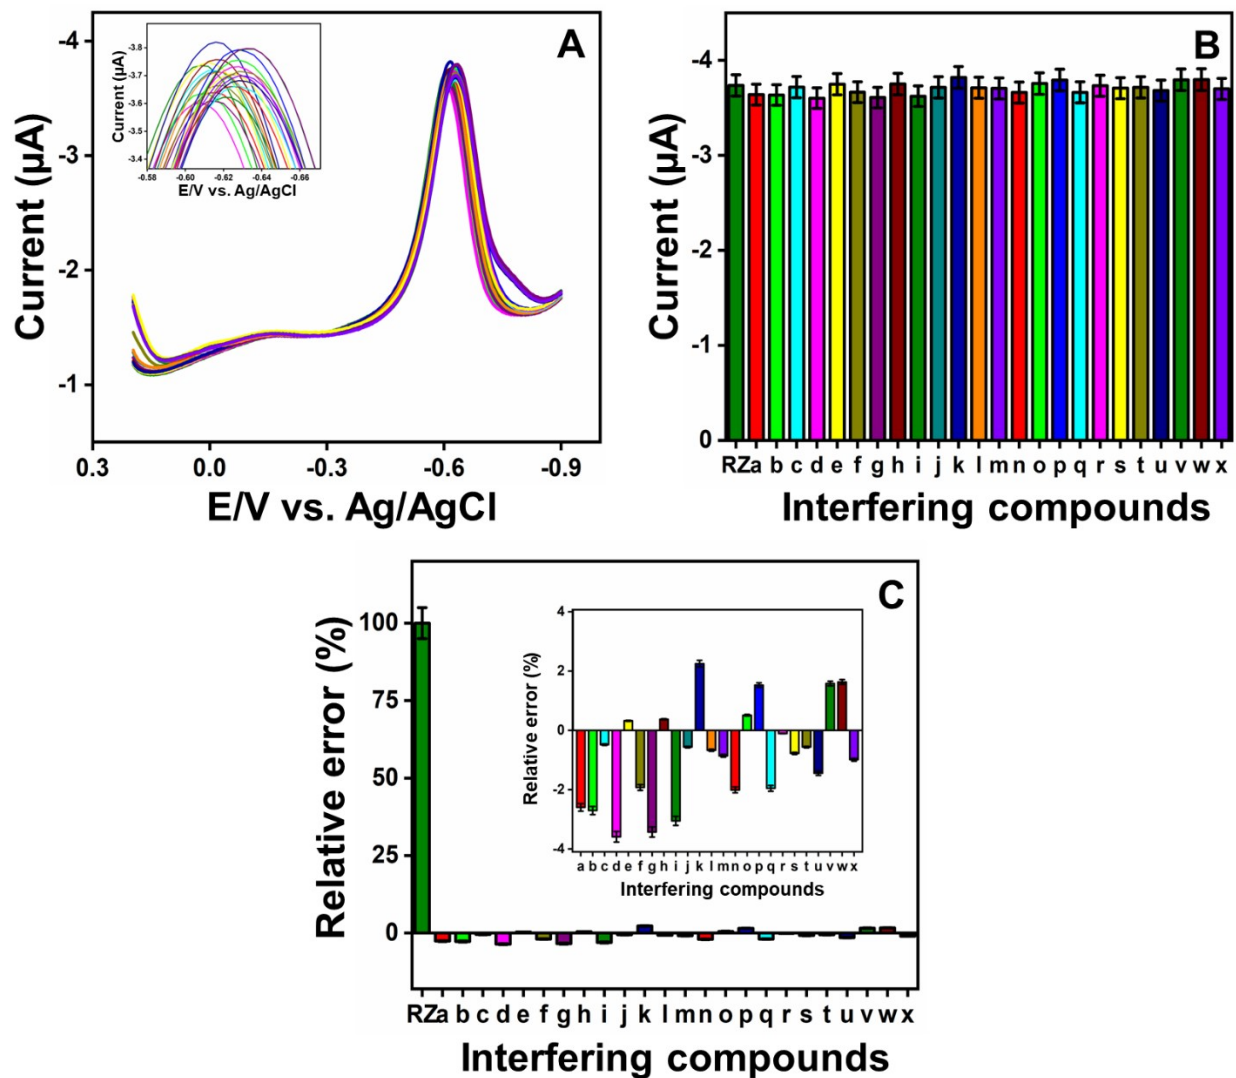

80

81 **Fig. S4** DPV response of (A) multiple interfering compounds (*inset*: at high magnification), (B)  
 82 its bar graph diagram, and (C) relative error bar diagram (*inset*: at high magnification) at  
 83 ZC/NCS/GCE.

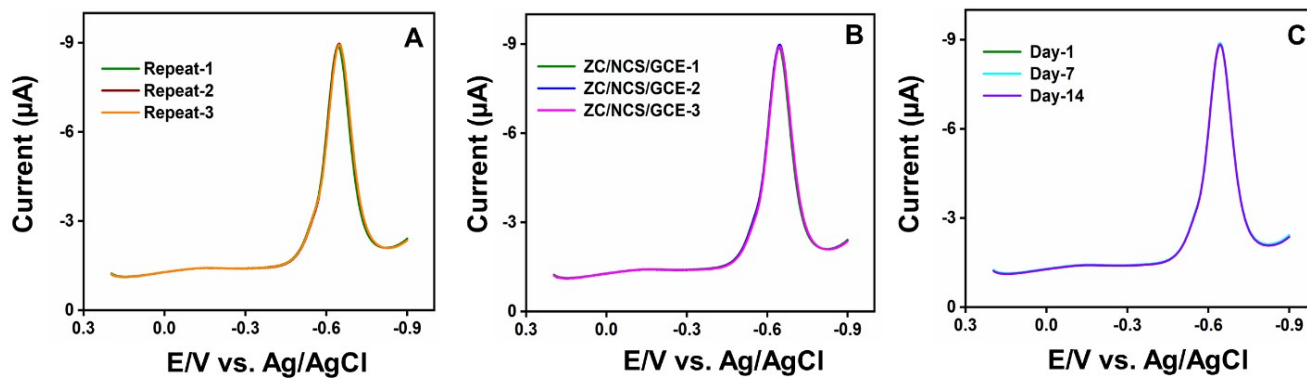

84

85 **Fig. S5** Electroanalytical performance results (A) Repeatability, (B) Reproducibility, and (C)  
 86 Stability tests of ZC/NCS/GCE.

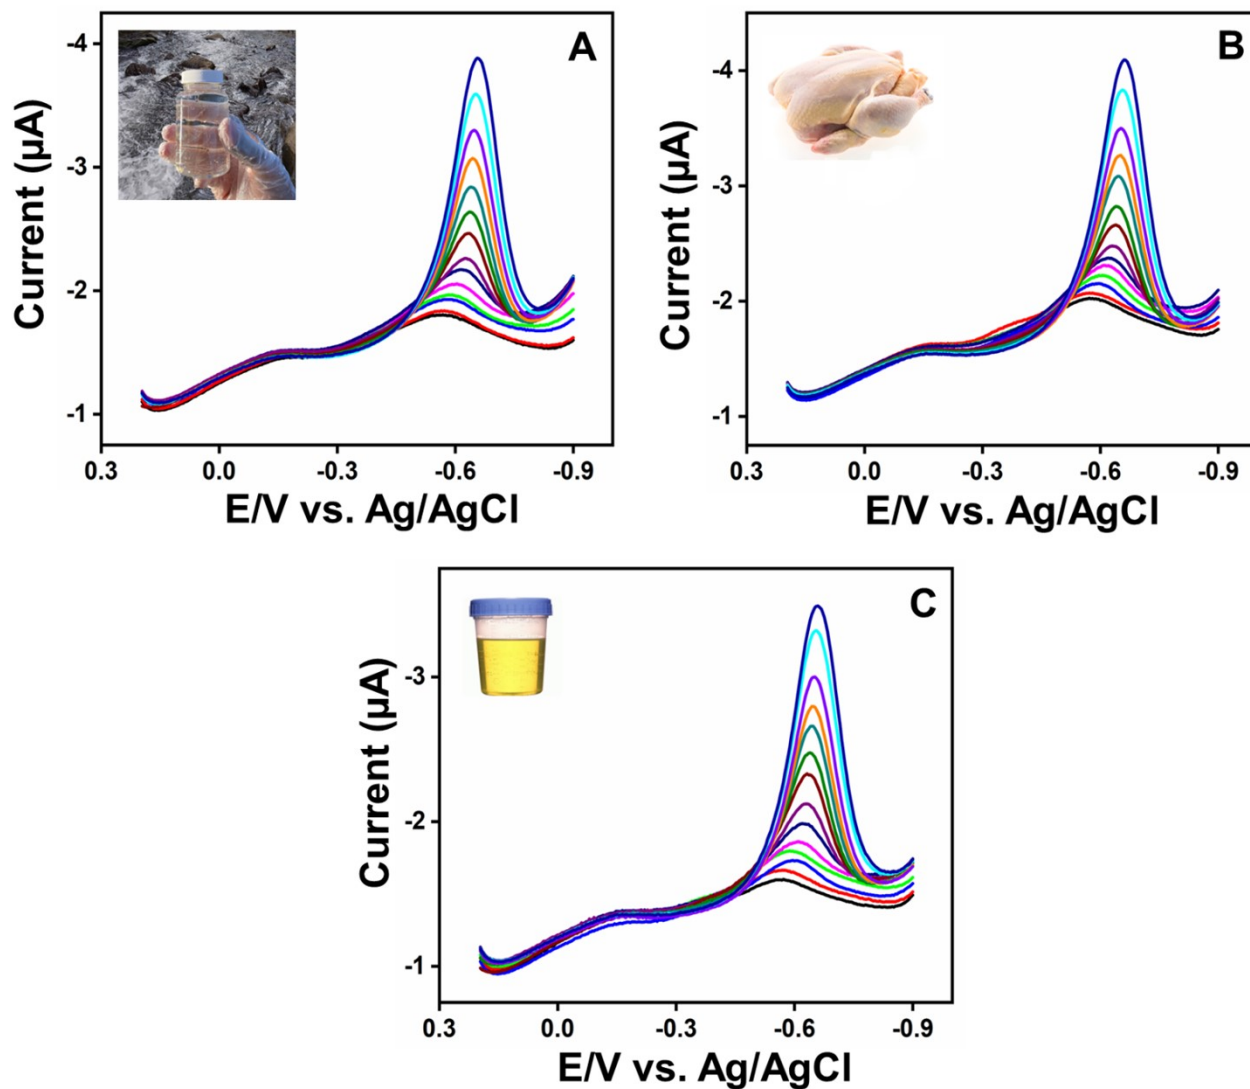

87

88 **Fig. S6** Real sample analysis of ZC/NCS/GCE on (A) River water, (B) Chicken meat extract and  
 89 (C) Human urine.

90 **Table S1** Electrochemical detection of RZ in Real samples (n=3).

| Real samples | Added ( $\mu\text{M}$ ) | Found ( $\mu\text{M}$ ) | Recovery (%) | Mean $\pm$ RSD    |
|--------------|-------------------------|-------------------------|--------------|-------------------|
| River water  | 2.1                     | 2.096                   | 98.6         | 98.4 $\pm$ 0.119  |
|              | 18.1                    | 18.098                  | 99.6         | 99.4 $\pm$ 0.003  |
|              | 38.1                    | 38.096                  | 99.5         | 99.5 $\pm$ 0.006  |
|              | 39.1                    | 39.098                  | 99.8         | 99.6 $\pm$ 0.006  |
|              | 42.1                    | 42.099                  | 99.9         | 99.8 $\pm$ 0.001  |
| Chicken      | 2.1                     | 2.105                   | 101.8        | 100.4 $\pm$ 0.013 |
|              | 18.1                    | 18.099                  | 99.8         | 99.6 $\pm$ 0.002  |
|              | 38.1                    | 38.094                  | 99.2         | 99.4 $\pm$ 0.002  |
|              | 39.1                    | 39.092                  | 99.1         | 99.3 $\pm$ 0.005  |
|              | 42.1                    | 42.097                  | 99.7         | 99.8 $\pm$ 0.002  |
| Human urine  | 2.1                     | 2.098                   | 99.3         | 99.4 $\pm$ 0.024  |
|              | 18.1                    | 18.097                  | 99.4         | 102.3 $\pm$ 0.047 |



|       |      |        |      |             |
|-------|------|--------|------|-------------|
| Urine | 38.1 | 38.096 | 99.6 | 100.6±0.018 |
|       | 39.1 | 39.09  | 98.9 | 97.8±0.029  |
|       | 42.1 | 42.099 | 99.9 | 99.3±0.009  |

---

91

92

93
